# Supplementary material for: Multitemporal characterization of a proglacial system: a multidisciplinary approach
Source: Copernicus journal article supplement (doi:10.5194/essd-16-3283-2024), 2024-07-17
Supplement: Supplementary file 1 [file essd-16-3283-2024-supplement.pdf]

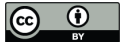

*Supplement of*

## **Multitemporal characterization of a proglacial system: a multidisciplinary approach**

**Elisabetta Corte et al.**

*Correspondence to:* Elisabetta Corte ([elisabetta.corte@polito.it](mailto:elisabetta.corte@polito.it))

The copyright of individual parts of the supplement might differ from the article licence.

# Rutor Digisky aerial 2020

Processing Report

07 May 2024

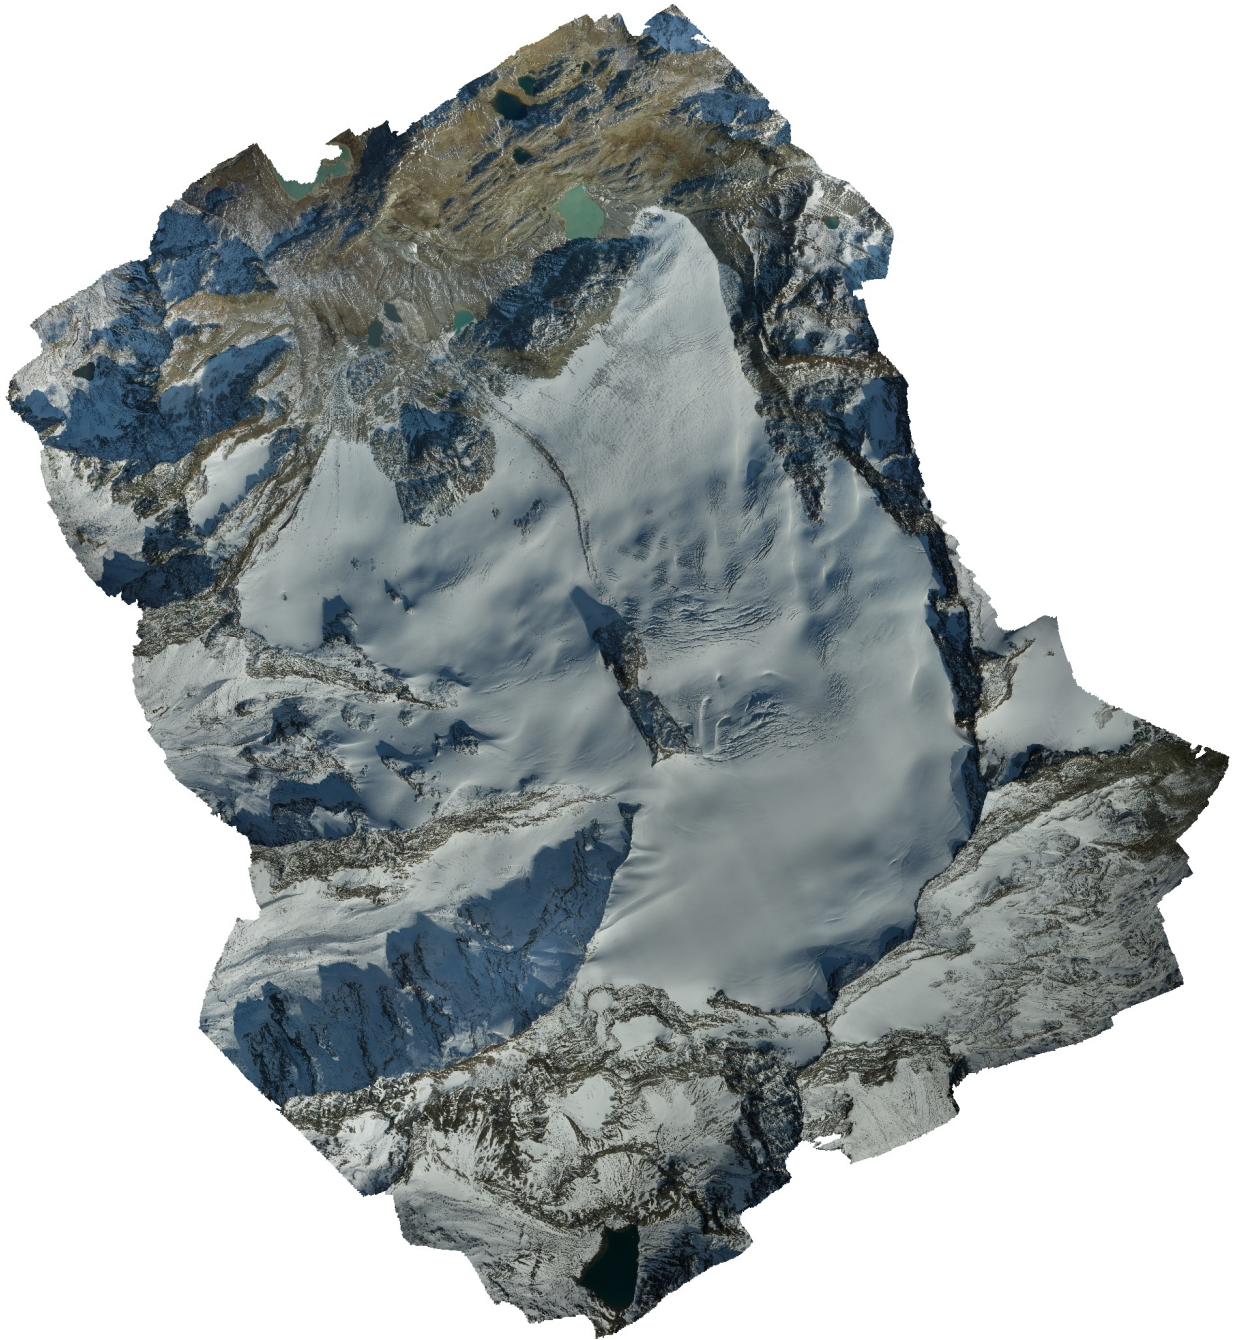

# Survey Data

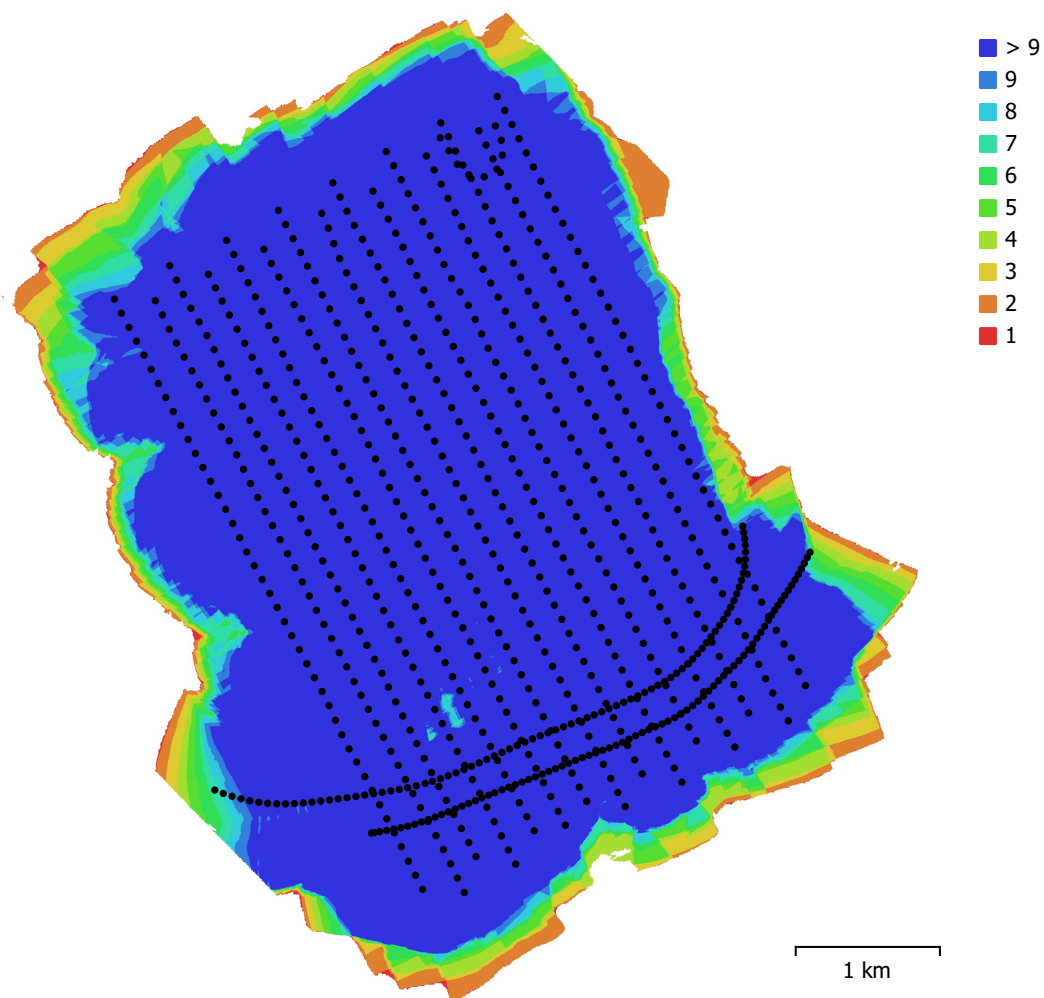

Fig. 1. Camera locations and image overlap.

|                    |                      |                     |           |
|--------------------|----------------------|---------------------|-----------|
| Number of images:  | 867                  | Camera stations:    | 815       |
| Flying altitude:   | 818 m                | Tie points:         | 370,551   |
| Ground resolution: | 5.96 cm/pix          | Projections:        | 2,553,517 |
| Coverage area:     | 25.1 km <sup>2</sup> | Reprojection error: | 0.395 pix |

| Camera Model             | Resolution    | Focal Length | Pixel Size          | Precalibrated |
|--------------------------|---------------|--------------|---------------------|---------------|
| iXM-RS150F, Rodenstoc... | 14204 x 10652 | 50 mm        | 3.76 x 3.76 $\mu$ m | No            |

Table 1. Cameras.

# Camera Calibration

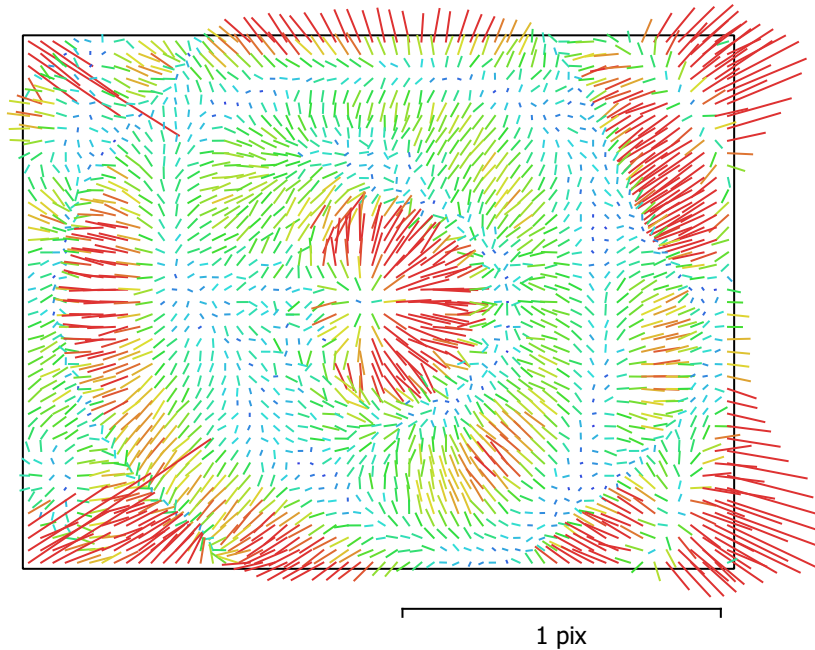

Fig. 2. Image residuals for iXM-RS150F, Rodenstock RS-50mm/Aerial (50mm).

## iXM-RS150F, Rodenstock RS-50mm/Aerial (50mm)

817 images

|              |                      |              |                                      |
|--------------|----------------------|--------------|--------------------------------------|
| Type         | Resolution           | Focal Length | Pixel Size                           |
| <b>Frame</b> | <b>14204 x 10652</b> | <b>50 mm</b> | <b>3.76 x 3.76 <math>\mu</math>m</b> |

|           | Value               | Error   | F    | Cx    | Cy    | B1    | B2    | K1    | K2    | K3    | K4    | P1    | P2    |
|-----------|---------------------|---------|------|-------|-------|-------|-------|-------|-------|-------|-------|-------|-------|
| <b>F</b>  | <b>13743.3</b>      | 0.038   | 1.00 | -0.08 | -0.61 | 0.18  | 0.15  | -0.10 | 0.11  | -0.09 | 0.08  | -0.01 | -0.06 |
| <b>Cx</b> | <b>57.3174</b>      | 0.0087  |      | 1.00  | 0.04  | -0.02 | 0.03  | -0.00 | 0.01  | -0.01 | 0.01  | 0.88  | -0.01 |
| <b>Cy</b> | <b>-8.78157</b>     | 0.0093  |      |       | 1.00  | -0.13 | -0.09 | -0.01 | 0.00  | -0.00 | 0.01  | 0.00  | 0.67  |
| <b>B1</b> | <b>0.315167</b>     | 0.0029  |      |       |       | 1.00  | 0.01  | 0.02  | -0.02 | 0.02  | -0.01 | 0.01  | 0.01  |
| <b>B2</b> | <b>-0.896992</b>    | 0.0029  |      |       |       |       | 1.00  | 0.00  | 0.00  | -0.00 | 0.00  | 0.01  | -0.00 |
| <b>K1</b> | <b>-0.00506231</b>  | 9.7e-06 |      |       |       |       |       | 1.00  | -0.97 | 0.93  | -0.88 | -0.01 | -0.02 |
| <b>K2</b> | <b>0.0065116</b>    | 9.1e-05 |      |       |       |       |       |       | 1.00  | -0.99 | 0.96  | 0.01  | -0.01 |
| <b>K3</b> | <b>0.063094</b>     | 0.00034 |      |       |       |       |       |       |       | 1.00  | -0.99 | -0.01 | 0.00  |
| <b>K4</b> | <b>-0.126768</b>    | 0.00042 |      |       |       |       |       |       |       |       | 1.00  | 0.01  | -0.00 |
| <b>P1</b> | <b>-1.88636e-06</b> | 2.3e-07 |      |       |       |       |       |       |       |       |       | 1.00  | 0.00  |
| <b>P2</b> | <b>8.44211e-05</b>  | 2e-07   |      |       |       |       |       |       |       |       |       |       | 1.00  |

Table 2. Calibration coefficients and correlation matrix.



# Ground Control Points

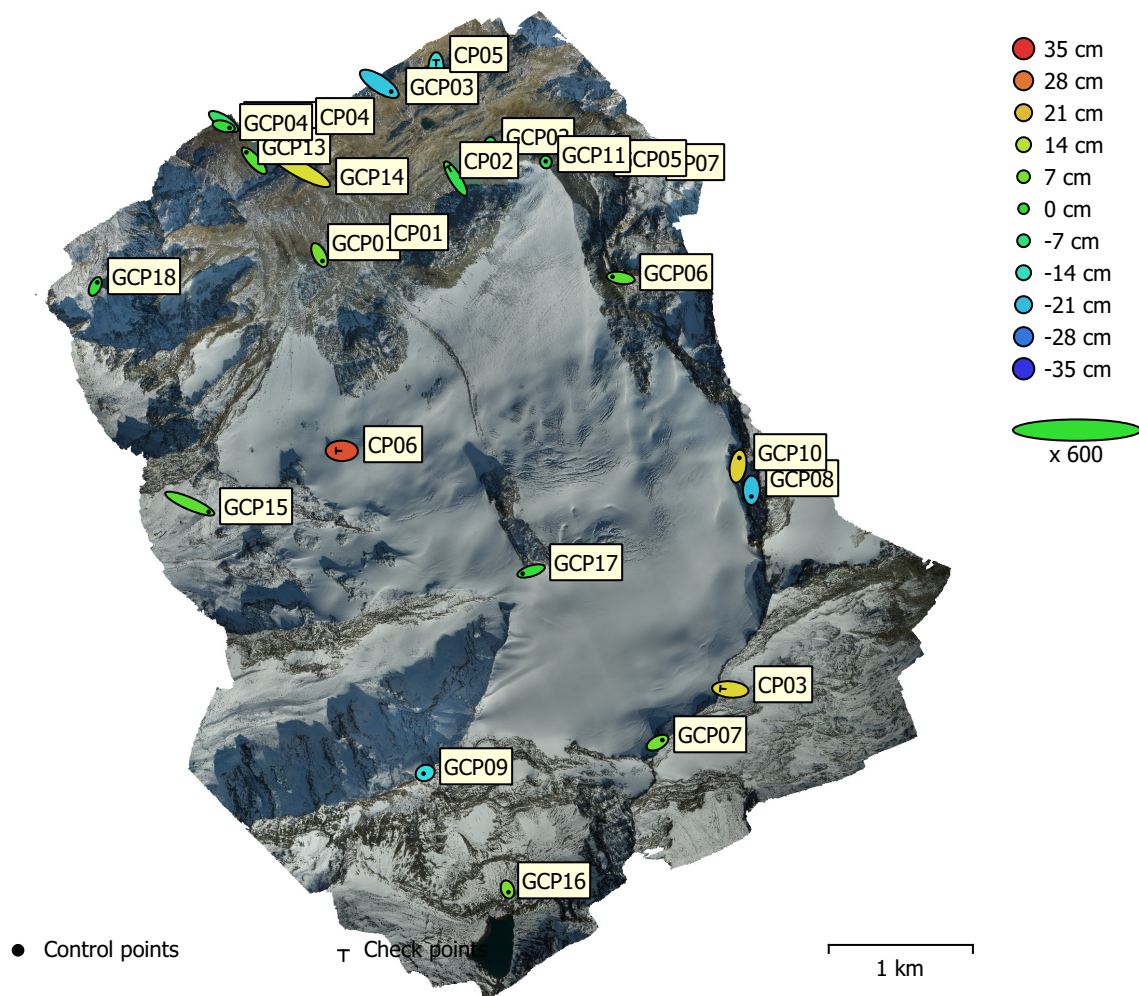

Fig. 3. GCP locations and error estimates.

Z error is represented by ellipse color. X,Y errors are represented by ellipse shape.

Estimated GCP locations are marked with a dot or crossing.

| Count | X error (cm) | Y error (cm) | Z error (cm) | XY error (cm) | Total (cm) |
|-------|--------------|--------------|--------------|---------------|------------|
| 18    | 20.4103      | 13.1059      | 10.6057      | 24.2558       | 26.4731    |

Table 3. Control points RMSE.

X - Easting, Y - Northing, Z - Altitude.

| Count | X error (cm) | Y error (cm) | Z error (cm) | XY error (cm) | Total (cm) |
|-------|--------------|--------------|--------------|---------------|------------|
| 7     | 18.9872      | 14.9458      | 17.1342      | 24.1639       | 29.6222    |

Table 4. Check points RMSE.

X - Easting, Y - Northing, Z - Altitude.

| <b>Label</b> | <b>X error (cm)</b> | <b>Y error (cm)</b> | <b>Z error (cm)</b> | <b>Total (cm)</b> | <b>Image (pix)</b> |
|--------------|---------------------|---------------------|---------------------|-------------------|--------------------|
| GCP03        | 27.4801             | -17.9738            | -19.7975            | 38.3425           | 4.939 (6)          |
| GCP07        | 11.1898             | 6.04222             | 6.81392             | 14.4274           | 7.586 (11)         |
| GCP02        | -0.576344           | -0.910239           | -0.0354436          | 1.07794           | 0.880 (4)          |
| GCP12        | 20.6082             | -13.3574            | -6.16604            | 25.3207           | 9.361 (2)          |
| GCP13        | -17.8797            | 19.4439             | 3.62027             | 26.6618           | 15.538 (6)         |
| GCP14        | -53.8209            | 29.3242             | 17.1002             | 63.6318           | 7.573 (6)          |
| GCP04        | 13.4534             | -3.6229             | -0.320234           | 13.9364           | 9.602 (2)          |
| GCP01        | 7.06918             | -13.7408            | 6.86747             | 16.9099           | 25.861 (11)        |
| GCP08        | -0.18408            | -14.3295            | -20.7021            | 25.1783           | 7.108 (6)          |
| GCP15        | 43.8527             | -19.0332            | 4.24094             | 47.9928           | 1.407 (15)         |
| GCP16        | 2.13234             | -6.34851            | 7.32216             | 9.92293           | 0.441 (38)         |
| GCP17        | -19.627             | -6.15624            | -0.23496            | 20.5712           | 2.006 (14)         |
| GCP18        | 4.50713             | 9.42268             | -0.968811           | 10.49             | 1.092 (6)          |
| GCP05        | 6.10044             | -1.36875            | 2.08238             | 6.58978           | 0.626 (12)         |
| GCP06        | -18.7612            | 2.75909             | 4.20062             | 19.4227           | 1.375 (13)         |
| GCP09        | -3.7706             | -1.32908            | -17.4568            | 17.9088           | 2.196 (10)         |
| GCP10        | 2.9897              | 19.104              | 18.9162             | 27.0504           | 2.015 (8)          |
| GCP11        | -0.400681           | 1.50072             | -3.12445            | 3.48925           | 0.379 (20)         |
| <b>Total</b> | <b>20.4103</b>      | <b>13.1059</b>      | <b>10.6057</b>      | <b>26.4731</b>    | <b>7.542</b>       |

Table 5. Control points.  
X - Easting, Y - Northing, Z - Altitude.

| <b>Label</b> | <b>X error (cm)</b> | <b>Y error (cm)</b> | <b>Z error (cm)</b> | <b>Total (cm)</b> | <b>Image (pix)</b> |
|--------------|---------------------|---------------------|---------------------|-------------------|--------------------|
| CP01         | -5.1403             | 9.42173             | -10.3172            | 14.8875           | 0.692 (17)         |
| CP02         | -17.3952            | 28.0749             | -2.35034            | 33.1107           | 0.622 (12)         |
| CP06         | -13.6064            | 0.165417            | 31.9515             | 34.7284           | 2.317 (9)          |
| CP07         | 38.0926             | -0.224173           | 14.8818             | 40.897            | 2.382 (5)          |
| CP05         | 0.221481            | 22.0909             | -16.7647            | 27.7329           | 0.281 (7)          |
| CP04         | -4.0905             | 13.9503             | -8.84522            | 17.0171           | 0.972 (6)          |
| CP03         | -23.2729            | 1.99389             | 18.4778             | 29.7831           | 0.820 (23)         |
| <b>Total</b> | <b>18.9872</b>      | <b>14.9458</b>      | <b>17.1342</b>      | <b>29.6222</b>    | <b>1.186</b>       |

Table 6. Check points.  
X - Easting, Y - Northing, Z - Altitude.

# Digital Elevation Model

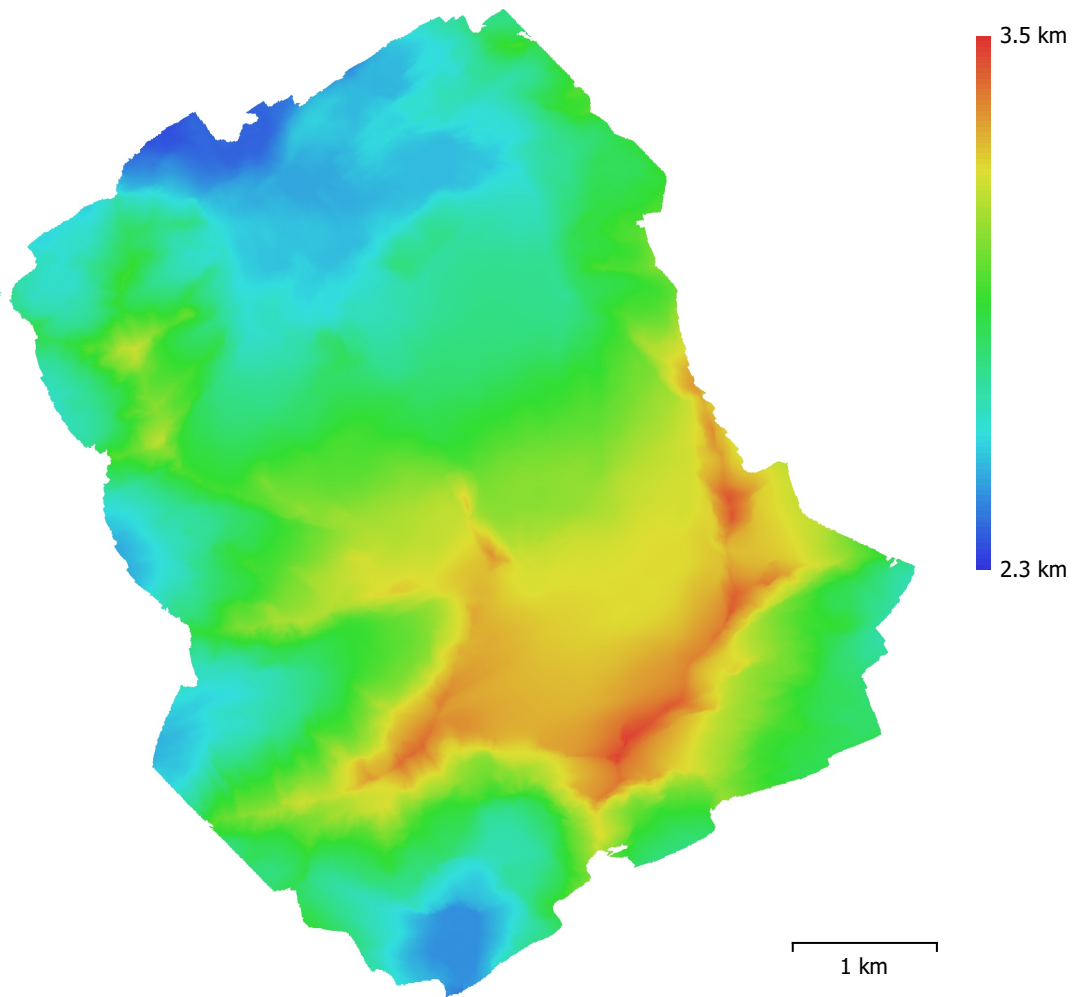

Fig. 4. Reconstructed digital elevation model.

Resolution: 9.14 m/pix  
Point density: 0.012 points/m<sup>2</sup>



# Processing Parameters

## General

|                   |                                           |
|-------------------|-------------------------------------------|
| Cameras           | 817                                       |
| Aligned cameras   | 815                                       |
| Markers           | 25                                        |
| Coordinate system | RDN2008 / UTM zone 32N (N-E) (EPSG::6707) |
| Rotation angles   | Yaw, Pitch, Roll                          |

## Tie Points

|                                |                         |
|--------------------------------|-------------------------|
| Points                         | 370,551 of 457,787      |
| RMS reprojection error         | 0.164229 (0.395351 pix) |
| Max reprojection error         | 1.50459 (26.8786 pix)   |
| Mean key point size            | 1.9327 pix              |
| Point colors                   | 3 bands, uint8          |
| Key points                     | No                      |
| Average tie point multiplicity | 7.48877                 |

## Alignment parameters

|                               |                      |
|-------------------------------|----------------------|
| Accuracy                      | Highest              |
| Generic preselection          | Yes                  |
| Reference preselection        | No                   |
| Key point limit               | 40,000               |
| Key point limit per Mpx       | 1,000                |
| Tie point limit               | 4,000                |
| Exclude stationary tie points | No                   |
| Guided image matching         | No                   |
| Adaptive camera model fitting | No                   |
| Matching time                 | 1 hours 6 minutes    |
| Matching memory usage         | 749.31 MB            |
| Alignment time                | 4 minutes 29 seconds |
| Alignment memory usage        | 705.62 MB            |

## Optimization parameters

|                               |                                  |
|-------------------------------|----------------------------------|
| Parameters                    | f, b1, b2, cx, cy, k1-k4, p1, p2 |
| Adaptive camera model fitting | No                               |
| Optimization time             | 9 seconds                        |
| Date created                  | 2021:11:15 15:02:18              |
| Software version              | 1.7.4.13028                      |
| File size                     | 62.21 MB                         |

## Model

|               |                               |
|---------------|-------------------------------|
| Faces         | 893,126                       |
| Vertices      | 448,567                       |
| Vertex colors | 3 bands, uint8                |
| Texture       | 8,192 x 8,192, 4 bands, uint8 |

## Texturing parameters

|                         |                      |
|-------------------------|----------------------|
| Mapping mode            | Generic              |
| Blending mode           | Mosaic               |
| Texture size            | 8,192                |
| Enable hole filling     | Yes                  |
| Enable ghosting filter  | Yes                  |
| UV mapping time         | 1 minutes 25 seconds |
| UV mapping memory usage | 875.45 MB            |
| Blending time           | 7 hours 31 minutes   |
| Blending memory usage   | 21.83 GB             |

|                  |                                          |
|------------------|------------------------------------------|
| File size        | 261.90 MB                                |
| <b>System</b>    |                                          |
| Software name    | Agisoft Metashape Professional           |
| Software version | 2.0.3 build 16960                        |
| OS               | Windows 64 bit                           |
| RAM              | 63.69 GB                                 |
| CPU              | Intel(R) Core(TM) i9-9900X CPU @ 3.50GHz |
| GPU(s)           | NVIDIA GeForce RTX 2060                  |

# Rutor Digisky aerial 2021

Processing Report

07 May 2024

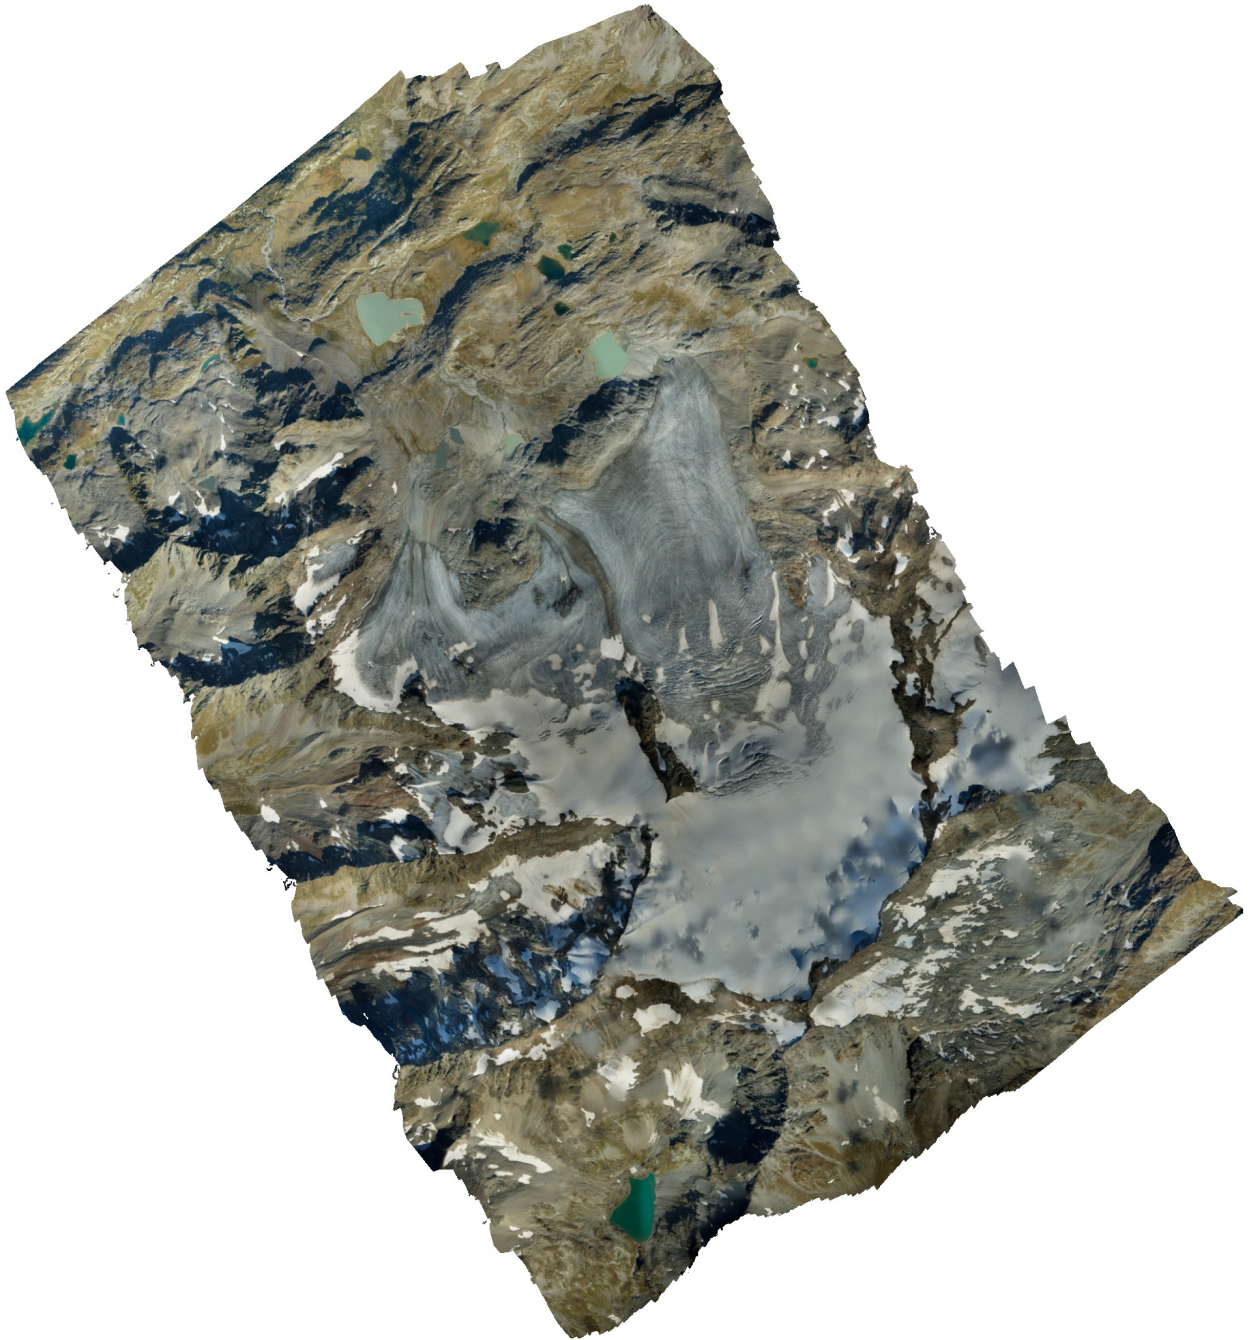

# Survey Data

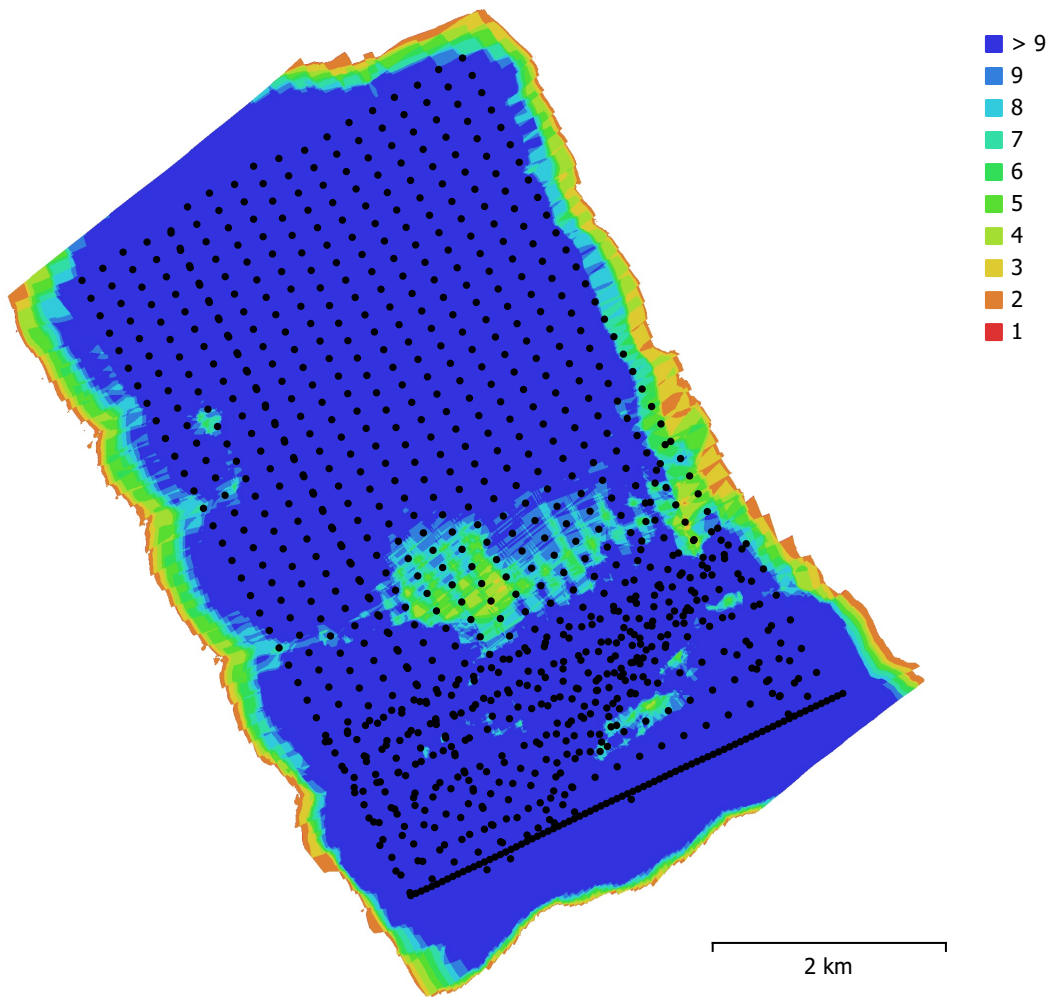

Fig. 1. Camera locations and image overlap.

|                    |                      |                     |           |
|--------------------|----------------------|---------------------|-----------|
| Number of images:  | 1,030                | Camera stations:    | 997       |
| Flying altitude:   | 804 m                | Tie points:         | 505,977   |
| Ground resolution: | 6.27 cm/pix          | Projections:        | 3,425,721 |
| Coverage area:     | 34.8 km <sup>2</sup> | Reprojection error: | 0.586 pix |

| Camera Model             | Resolution    | Focal Length | Pixel Size     | Precalibrated |
|--------------------------|---------------|--------------|----------------|---------------|
| iXM-RS150F, Rodenstoc... | 14204 x 10652 | 50 mm        | 3.76 x 3.76 μm | No            |

Table 1. Cameras.

# Camera Calibration

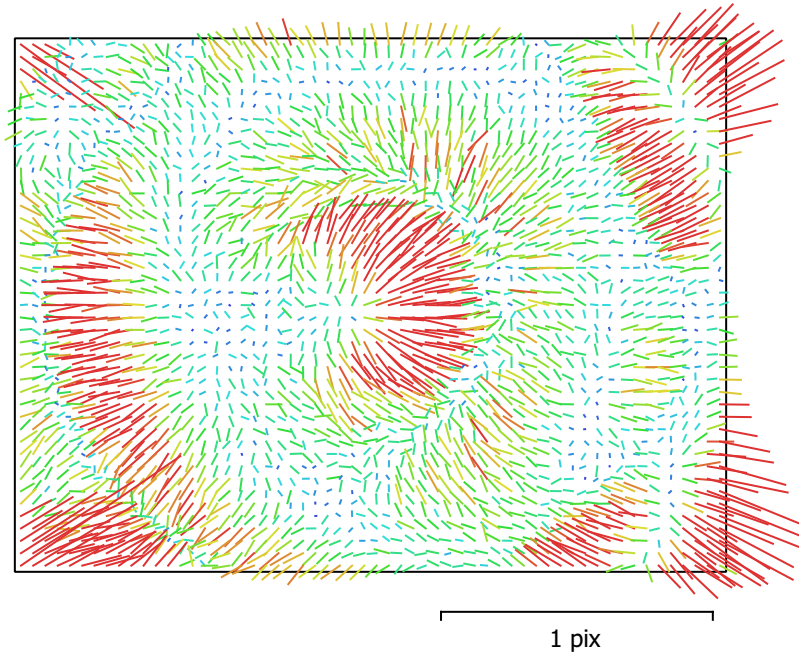

Fig. 2. Image residuals for iXM-RS150F, Rodenstock RS-50mm/Aerial (50mm).

## iXM-RS150F, Rodenstock RS-50mm/Aerial (50mm)

1014 images

|              |                      |              |                                      |
|--------------|----------------------|--------------|--------------------------------------|
| Type         | Resolution           | Focal Length | Pixel Size                           |
| <b>Frame</b> | <b>14204 x 10652</b> | <b>50 mm</b> | <b>3.76 x 3.76 <math>\mu</math>m</b> |

|           | Value              | Error   | F    | Cx    | Cy    | B1    | B2    | K1    | K2    | K3    | K4    | P1    | P2    |
|-----------|--------------------|---------|------|-------|-------|-------|-------|-------|-------|-------|-------|-------|-------|
| <b>F</b>  | <b>13740.6</b>     | 0.1     | 1.00 | -0.31 | -0.67 | 0.05  | -0.06 | -0.06 | 0.06  | -0.05 | 0.04  | -0.01 | -0.01 |
| <b>Cx</b> | <b>58.0346</b>     | 0.013   |      | 1.00  | 0.20  | -0.05 | 0.08  | -0.00 | 0.00  | -0.00 | 0.01  | 0.76  | -0.01 |
| <b>Cy</b> | <b>-7.72876</b>    | 0.014   |      |       | 1.00  | -0.08 | 0.02  | 0.00  | -0.01 | 0.00  | 0.00  | 0.00  | 0.57  |
| <b>B1</b> | <b>0.217977</b>    | 0.0036  |      |       |       | 1.00  | -0.00 | 0.02  | -0.02 | 0.02  | -0.02 | 0.01  | 0.01  |
| <b>B2</b> | <b>-0.90192</b>    | 0.0036  |      |       |       |       | 1.00  | 0.00  | -0.00 | 0.00  | 0.00  | 0.00  | 0.02  |
| <b>K1</b> | <b>-0.00483364</b> | 1.4e-05 |      |       |       |       |       | 1.00  | -0.98 | 0.93  | -0.89 | -0.01 | -0.00 |
| <b>K2</b> | <b>0.0106506</b>   | 0.00013 |      |       |       |       |       |       | 1.00  | -0.99 | 0.96  | 0.01  | -0.01 |
| <b>K3</b> | <b>0.0479761</b>   | 0.00047 |      |       |       |       |       |       |       | 1.00  | -0.99 | -0.01 | 0.01  |
| <b>K4</b> | <b>-0.111596</b>   | 0.00058 |      |       |       |       |       |       |       |       | 1.00  | 0.01  | -0.00 |
| <b>P1</b> | <b>1.54472e-05</b> | 2.9e-07 |      |       |       |       |       |       |       |       |       | 1.00  | -0.00 |
| <b>P2</b> | <b>9.69403e-05</b> | 2.6e-07 |      |       |       |       |       |       |       |       |       |       | 1.00  |

Table 2. Calibration coefficients and correlation matrix.



# Ground Control Points

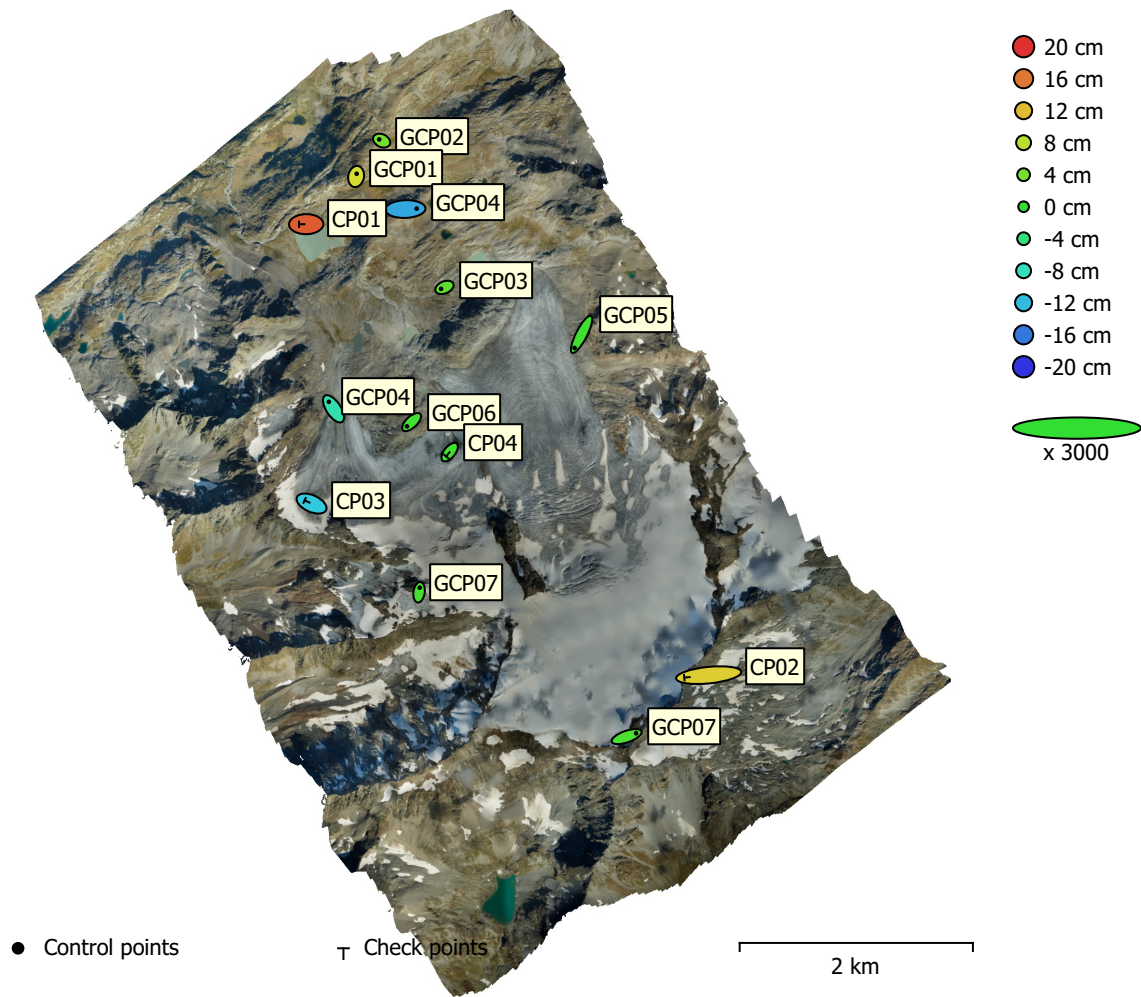

Fig. 3. GCP locations and error estimates.

Z error is represented by ellipse color. X,Y errors are represented by ellipse shape.

Estimated GCP locations are marked with a dot or crossing.

| Count | X error (cm) | Y error (cm) | Z error (cm) | XY error (cm) | Total (cm) |
|-------|--------------|--------------|--------------|---------------|------------|
| 9     | 3.44737      | 3.2796       | 6.15283      | 4.75816       | 7.77801    |

Table 3. Control points RMSE.

X - Easting, Y - Northing, Z - Altitude.

| Count | X error (cm) | Y error (cm) | Z error (cm) | XY error (cm) | Total (cm) |
|-------|--------------|--------------|--------------|---------------|------------|
| 4     | 7.59541      | 1.6699       | 11.7984      | 7.77681       | 14.1309    |

Table 4. Check points RMSE.

X - Easting, Y - Northing, Z - Altitude.



| <b>Label</b> | <b>X error (cm)</b> | <b>Y error (cm)</b> | <b>Z error (cm)</b> | <b>Total (cm)</b> | <b>Image (pix)</b> |
|--------------|---------------------|---------------------|---------------------|-------------------|--------------------|
| GCP07        | 0.376596            | 2.63743             | 1.19937             | 2.92171           | 0.336 (11)         |
| GCP04        | -2.66182            | 4.03174             | -7.0668             | 8.56037           | 0.309 (32)         |
| GCP02        | -1.3843             | 0.683368            | 3.88985             | 4.185             | 0.348 (21)         |
| GCP07        | 5.41751             | 1.89144             | 1.57074             | 5.9493            | 1.067 (8)          |
| GCP03        | -1.94006            | -0.826232           | 2.51957             | 3.28554           | 0.316 (20)         |
| GCP01        | 0.32524             | 1.57072             | 9.46181             | 9.59681           | 0.331 (29)         |
| GCP06        | -2.62369            | -2.45089            | 0.962234            | 3.71706           | 0.231 (17)         |
| GCP05        | -3.98059            | -7.76768            | 0.672345            | 8.75409           | 0.280 (16)         |
| GCP04        | 6.47053             | 0.2299              | -13.2094            | 14.7108           | 2.227 (10)         |
| <b>Total</b> | <b>3.44737</b>      | <b>3.2796</b>       | <b>6.15283</b>      | <b>7.77801</b>    | <b>0.667</b>       |

Table 5. Control points.  
X - Easting, Y - Northing, Z - Altitude.

| <b>Label</b> | <b>X error (cm)</b> | <b>Y error (cm)</b> | <b>Z error (cm)</b> | <b>Total (cm)</b> | <b>Image (pix)</b> |
|--------------|---------------------|---------------------|---------------------|-------------------|--------------------|
| CP03         | -3.9849             | 1.78171             | -11.2822            | 12.0972           | 0.248 (21)         |
| CP04         | -2.00467            | -2.45014            | 0.929865            | 3.29948           | 0.430 (6)          |
| CP01         | -4.0963             | -0.0558166          | 17.5501             | 18.0219           | 0.311 (5)          |
| CP02         | -13.9314            | -1.40479            | 10.9844             | 17.7964           | 0.322 (8)          |
| <b>Total</b> | <b>7.59541</b>      | <b>1.6699</b>       | <b>11.7984</b>      | <b>14.1309</b>    | <b>0.305</b>       |

Table 6. Check points.  
X - Easting, Y - Northing, Z - Altitude.

# Digital Elevation Model

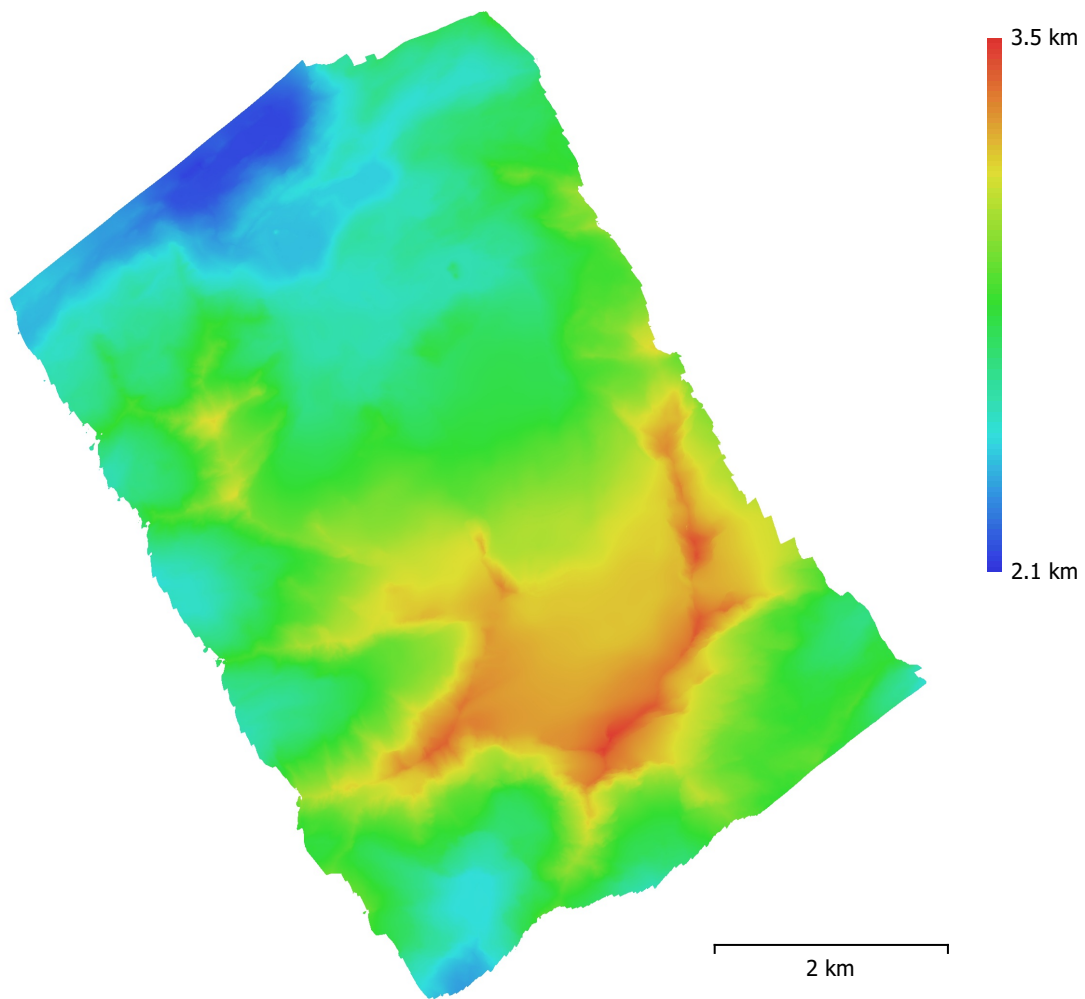

Fig. 4. Reconstructed digital elevation model.

Resolution: 12.5 cm/pix  
Point density: 63.6 points/m<sup>2</sup>

# Processing Parameters

## General

|                   |                                           |
|-------------------|-------------------------------------------|
| Cameras           | 1014                                      |
| Aligned cameras   | 997                                       |
| Markers           | 13                                        |
| Coordinate system | RDN2008 / UTM zone 32N (N-E) (EPSG::6707) |
| Rotation angles   | Yaw, Pitch, Roll                          |

## Tie Points

|                                |                         |
|--------------------------------|-------------------------|
| Points                         | 505,977 of 587,355      |
| RMS reprojection error         | 0.105898 (0.586334 pix) |
| Max reprojection error         | 0.509266 (43.2814 pix)  |
| Mean key point size            | 4.98914 pix             |
| Point colors                   | 3 bands, uint8          |
| Key points                     | No                      |
| Average tie point multiplicity | 7.45368                 |

## Alignment parameters

|                               |                      |
|-------------------------------|----------------------|
| Accuracy                      | Medium               |
| Generic preselection          | Yes                  |
| Reference preselection        | No                   |
| Key point limit               | 40,000               |
| Key point limit per Mpx       | 1,000                |
| Tie point limit               | 4,000                |
| Exclude stationary tie points | No                   |
| Guided image matching         | No                   |
| Adaptive camera model fitting | No                   |
| Matching time                 | 1 hours 11 minutes   |
| Matching memory usage         | 1.08 GB              |
| Alignment time                | 4 minutes 30 seconds |
| Alignment memory usage        | 439.61 MB            |

## Optimization parameters

|                               |                                  |
|-------------------------------|----------------------------------|
| Parameters                    | f, b1, b2, cx, cy, k1-k4, p1, p2 |
| Adaptive camera model fitting | No                               |
| Optimization time             | 9 seconds                        |
| Date created                  | 2021:10:30 10:20:40              |
| Software version              | 1.7.4.13028                      |
| File size                     | 80.19 MB                         |

## Depth Maps

|       |      |
|-------|------|
| Count | 1033 |
|-------|------|

## Depth maps generation parameters

|                  |                     |
|------------------|---------------------|
| Quality          | High                |
| Filtering mode   | Mild                |
| Max neighbors    | 40                  |
| Processing time  | 14 hours 37 minutes |
| Memory usage     | 56.47 GB            |
| Date created     | 2021:11:20 08:08:36 |
| Software version | 1.7.4.13028         |
| File size        | 44.83 GB            |

## Point Cloud

|        |               |
|--------|---------------|
| Points | 3,342,984,543 |
|--------|---------------|

## Point attributes

|       |                |
|-------|----------------|
| Color | 3 bands, uint8 |
|-------|----------------|

|                                          |                                           |
|------------------------------------------|-------------------------------------------|
| Normal                                   |                                           |
| Confidence                               | 1 - 80                                    |
| <b>Point classes</b>                     |                                           |
| Created (never classified)               | 3,342,984,543                             |
| <b>Depth maps generation parameters</b>  |                                           |
| Quality                                  | High                                      |
| Filtering mode                           | Mild                                      |
| Max neighbors                            | 40                                        |
| Processing time                          | 14 hours 37 minutes                       |
| Memory usage                             | 56.47 GB                                  |
| <b>Point cloud generation parameters</b> |                                           |
| Processing time                          | 1 days 2 hours                            |
| Memory usage                             | 54.45 GB                                  |
| Date created                             | 2023:06:20 15:39:22                       |
| Software version                         | 1.8.3.14331                               |
| File size                                | 46.60 GB                                  |
| <b>DEM</b>                               |                                           |
| Size                                     | 76,675 x 78,207                           |
| Coordinate system                        | RDN2008 / UTM zone 32N (N-E) (EPSG::6707) |
| <b>Reconstruction parameters</b>         |                                           |
| Source data                              | Point cloud                               |
| Interpolation                            | Enabled                                   |
| Processing time                          | 48 minutes 30 seconds                     |
| Memory usage                             | 380.62 MB                                 |
| Date created                             | 2023:06:21 08:11:46                       |
| Software version                         | 1.8.3.14331                               |
| File size                                | 7.69 GB                                   |
| <b>Orthomosaic</b>                       |                                           |
| Size                                     | 125,215 x 135,015                         |
| Coordinate system                        | RDN2008 / UTM zone 32N (N-E) (EPSG::6707) |
| Colors                                   | 3 bands, uint8                            |
| <b>Reconstruction parameters</b>         |                                           |
| Blending mode                            | Mosaic                                    |
| Surface                                  | DEM                                       |
| Enable hole filling                      | Yes                                       |
| Enable ghosting filter                   | No                                        |
| Processing time                          | 10 hours 39 minutes                       |
| Memory usage                             | 5.97 GB                                   |
| Date created                             | 2023:06:21 17:55:54                       |
| Software version                         | 1.8.3.14331                               |
| File size                                | 193.27 GB                                 |
| <b>System</b>                            |                                           |
| Software name                            | Agisoft Metashape Professional            |
| Software version                         | 2.0.3 build 16960                         |
| OS                                       | Windows 64 bit                            |
| RAM                                      | 63.68 GB                                  |
| CPU                                      | Intel(R) Core(TM) i9-9900X CPU @ 3.50GHz  |
| GPU(s)                                   | Quadro RTX 4000                           |
